# Supplementary material for: Prevalence of and Risk Factors Associated With Nonfatal Overdose Among Veterans Who Have Experienced Homelessness
Source: PubMed Central journal article supplement (PMC7078753; doi:10.1001/jamanetworkopen.2020.1190), 2020-03-17
Supplement: jamanetwopen-3-e201190-s001.pdf [file jamanetwopen-3-e201190-s001.pdf]

## Supplementary Online Content

Riggs KR, Hoge AE, DeRussy AJ, et al. Prevalence of and risk factors associated with nonfatal overdose among veterans who have experienced homelessness *JAMA Netw Open*. 2020;3(3):e201190. doi:10.1001/jamanetworkopen.2020.1190

**eTable.** Characteristics of Survey Respondents and Nonrespondents

**eFigure.** Survey Question About Recent Personal Overdose

This supplementary material has been provided by the authors to give readers additional information about their work.

**eTable.** Characteristics of Survey Respondents and Nonrespondents

| Characteristic                    | Overall<br><i>n</i> (col %) | Respondents<br><i>n</i> (column %) | Non-<br>Respondents<br><i>n</i> (column %) | Response<br>Rate<br>row % | <i>P</i> value |
|-----------------------------------|-----------------------------|------------------------------------|--------------------------------------------|---------------------------|----------------|
| Primary Care Clinic               |                             |                                    |                                            |                           | <0.001         |
| H-PACT                            | 9095 (63.4)                 | 3394 (58.9)                        | 5701 (66.5)                                | 37.3%                     |                |
| Mainstream                        | 5245 (36.6)                 | 2372 (41.4)                        | 2873 (33.5)                                | 45.2%                     |                |
| Age                               |                             |                                    |                                            |                           | <0.001         |
| 18-49                             | 3852 (27.6)                 | 1074 (18.6)                        | 2878 (33.6)                                | 27.2%                     |                |
| 50-65                             | 7746 (54.0)                 | 3472 (60.2)                        | 4274 (49.9)                                | 44.8%                     |                |
| >65                               | 2642 (18.4)                 | 1220 (21.2)                        | 1422 (16.6)                                | 46.2%                     |                |
| Sex                               |                             |                                    |                                            |                           | 0.03           |
| Male                              | 13167 (91.8)                | 5260 (91.2)                        | 7907 (92.2)                                | 40.0%                     |                |
| Female                            | 1173 (8.2)                  | 506 (8.8)                          | 667 (7.8)                                  | 43.1%                     |                |
| Race                              |                             |                                    |                                            |                           | 0.02           |
| White                             | 6724 (46.9)                 | 2734 (47.4)                        | 3990 (46.5)                                | 40.7%                     |                |
| Black                             | 6183 (43.1)                 | 2507 (43.5)                        | 3676 (42.9)                                | 40.6%                     |                |
| Other                             | 391 (2.7)                   | 152 (2.6)                          | 239 (2.8)                                  | 38.9%                     |                |
| Missing                           | 1042 (7.3)                  | 373 (6.5)                          | 669 (7.8)                                  | 35.8%                     |                |
| Marital status                    |                             |                                    |                                            |                           | <0.001         |
| Married                           | 2097 (14.6)                 | 890 (15.4)                         | 1207 (14.1)                                | 42.4%                     |                |
| Divorced/separated                | 6936 (48.4)                 | 2886 (50.1)                        | 4050 (47.2)                                | 41.6%                     |                |
| Never married/other               | 5307 (37.0)                 | 1990 (34.5)                        | 3317 (38.7)                                | 37.5%                     |                |
| Income                            |                             |                                    |                                            |                           | 0.02           |
| <\$5,885                          | 6365 (44.4)                 | 2503 (43.4)                        | 3862 (45.0)                                | 39.3%                     |                |
| \$5,885-\$11,770                  | 2725 (19.0)                 | 1157 (20.1)                        | 1568 (18.3)                                | 42.5%                     |                |
| >\$11,770                         | 5250 (36.6)                 | 2106 (36.5)                        | 3144 (36.7)                                | 40.1%                     |                |
| Elixhauser Index                  |                             |                                    |                                            |                           | <0.001         |
| 0-2                               | 4877 (34.01)                | 1763 (30.6)                        | 3114 (36.3)                                | 36.2%                     |                |
| 3-4                               | 4974 (33.4)                 | 1977 (34.3)                        | 2817 (32.9)                                | 41.2%                     |                |
| >5                                | 4669 (32.6)                 | 2026 (35.1)                        | 2643 (30.8)                                | 43.4%                     |                |
| Traumatic brain injury            | 501 (3.5)                   | 178 (3.1)                          | 323 (3.8)                                  | 35.5%                     | 0.03           |
| Environmental hazards             | 49 (0.3)                    | 22 (0.4)                           | 27 (0.3)                                   | 44.9%                     | 0.50           |
| Mental Health/Substance Use       |                             |                                    |                                            |                           |                |
| PTSD                              | 4167 (29.1)                 | 1506 (26.1)                        | 2661 (31.0)                                | 36.1%                     | <0.001         |
| Depression                        | 8126 (56.7)                 | 3236 (56.1)                        | 4890 (57.0)                                | 39.8%                     | 0.28           |
| Anxiety disorder                  | 4028 (28.1)                 | 1609 (27.9)                        | 2419 (28.2)                                | 39.9%                     | 0.69           |
| Psychotic disorder                | 1951 (13.6)                 | 625 (10.8)                         | 1326 (15.5)                                | 32.0%                     | <0.001         |
| Alcohol use disorder              | 5848 (40.8)                 | 2258 (39.2)                        | 3590 (41.9)                                | 38.6%                     | 0.001          |
| Drug use disorder                 | 5496 (38.3)                 | 1999 (34.7)                        | 3497 (40.8)                                | 36.4%                     | <0.001         |
| Any of above                      | 11481 (80.1)                | 4503 (78.1)                        | 6978 (81.4)                                | 38.2%                     | <0.001         |
| Healthcare utilization            |                             |                                    |                                            |                           |                |
| Primary care visits               |                             |                                    |                                            |                           | <0.001         |
| 2-5                               | 4477 (31.2)                 | 1497 (26.0)                        | 2980 (34.8)                                | 33.4%                     |                |
| 6-11                              | 5152 (35.93)                | 2085 (36.2)                        | 3067 (35.8)                                | 40.5%                     |                |
| >11                               | 4711 (32.9)                 | 2184 (37.9)                        | 2527 (29.5)                                | 46.4%                     |                |
| Emergency department visits       |                             |                                    |                                            |                           | <0.001         |
| <8                                | 12836 (89.5)                | 5284 (91.6)                        | 7552 (88.1)                                | 41.2%                     |                |
| ≥8                                | 1504 (10.5)                 | 482 (8.4)                          | 1022 (11.9)                                | 32.1%                     |                |
| Any Hospitalization               | 5035 (35.1)                 | 1967 (34.1)                        | 3799 (65.9)                                | 39.1%                     | 0.04           |
| Receipt of VA social services     |                             |                                    |                                            |                           |                |
| Health care for homeless Veterans | 9920 (69.2)                 | 3747 (65.0)                        | 6173 (72.0)                                | 37.8%                     | <0.001         |
| Grant and per-diem voucher        | 3865 (27.0)                 | 1324 (23.0)                        | 2541 (29.6)                                | 34.3%                     | <0.001         |
| HUD-VASH                          | 8276 (57.7)                 | 3258 (56.5)                        | 5018 (58.5)                                | 39.4%                     | 0.02           |
| Justice outreach                  | 1381 (9.6)                  | 471 (8.2)                          | 910 (10.6)                                 | 34.1%                     | <0.001         |

Abbreviations: H-PACT = Homeless Patient Aligned Care Team; HUD-VASH = U.S. Housing and Urban Development – Veterans Affairs Supportive Housing; PTSD – post-traumatic stress disorder

**eFigure.** Survey Question About Recent Personal Overdose

5. In the last 3 years, have you had an overdose where you needed to go to the emergency room or get medical care right away?

No

Yes **→**

5a. What were you taking at the time of your most recent overdose? (Select all that apply.)

Alcohol

Heroin or fentanyl not from a doctor

Opioid painkillers like Percocet, Lortab, morphine, oxycodone, hydrocodone, tramadol or others

Methadone

Cocaine

Sedatives like Klonopin, Xanax or Valium

Gabapentin, Lyrica or pregabalin

Other
